# Supplementary material for: Influence of receptor flexibility on intramolecular H-bonding interactions
Source: Royal Society of Chemistry journal article supplement (doi:10.1039/c5ob00805k), 2015-01-01
Supplement: c5ob00805k1.pdf [file c5ob00805k1.pdf]

## **Influence of receptor flexibility on intramolecular hydrogen bonding**

*Hongmei Sun,<sup>b</sup> Kai Guo,<sup>c</sup> Haifeng Gan,<sup>c</sup> Xin Li<sup>c</sup> and Christopher A. Hunter<sup>a,b \*</sup>*

### **Supplementary Information**

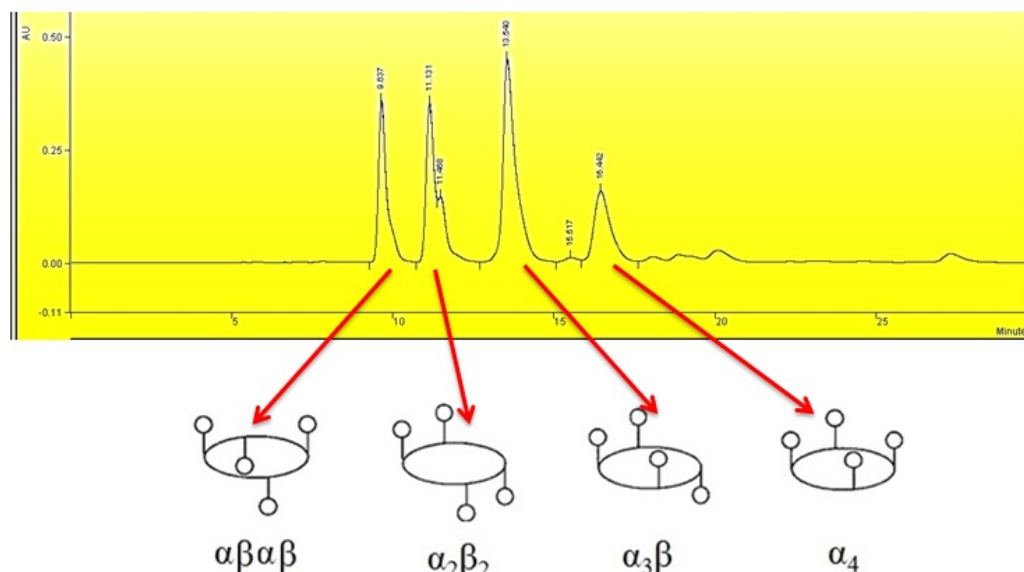

**Fig. S1.** HPLC separation for the four atropisomers of P3aCl. Conditions: XBridge C18 Column (5 $\mu$ m, 4.6 $\times$ 250mm); room temperature; mobile phase, isocratic elution with 80% acetonitrile in water with 0.1% TFA for 30 minutes; detection at 420nm. Retention time for each atropisomer:  $t_R(\alpha\beta\alpha\beta)$  = 9.64 min;  $t_R(\alpha_2\beta_2)$  = 11.13 min;  $t_R(\alpha_3\beta)$  = 13.54 min;  $t_R(\alpha_4)$  = 16.44 min.

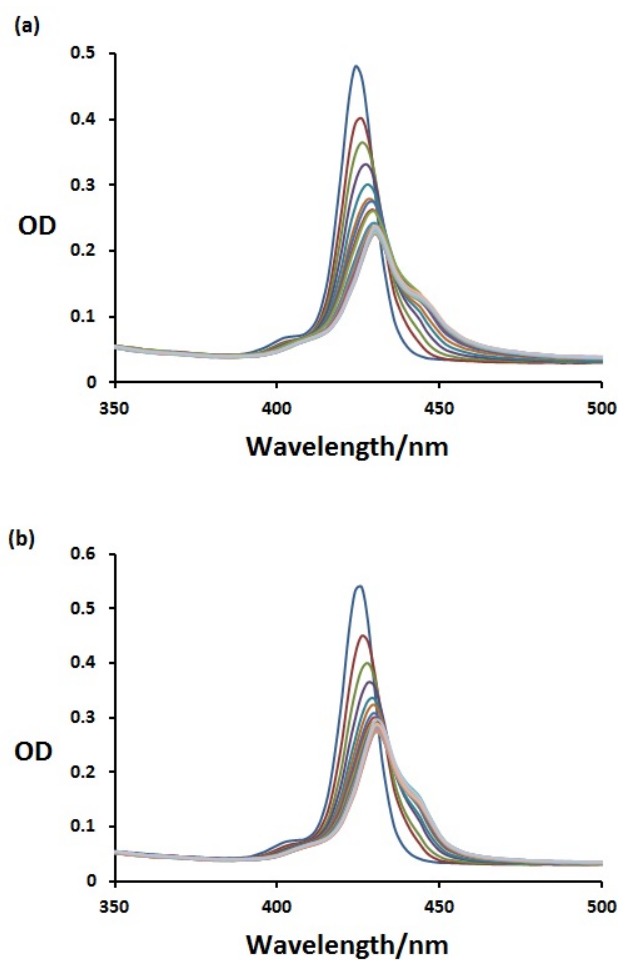

**Fig. S2.** Plate reader UV/Vis spectra of not simple 1:1 binding titration in toluene (a) P4aCl  $\alpha\beta\alpha\beta$  (5  $\mu$ M) with L3e (2 mM) (b) P4aCl  $\alpha_2\beta_2$  (5  $\mu$ M) with L3e (2 mM).

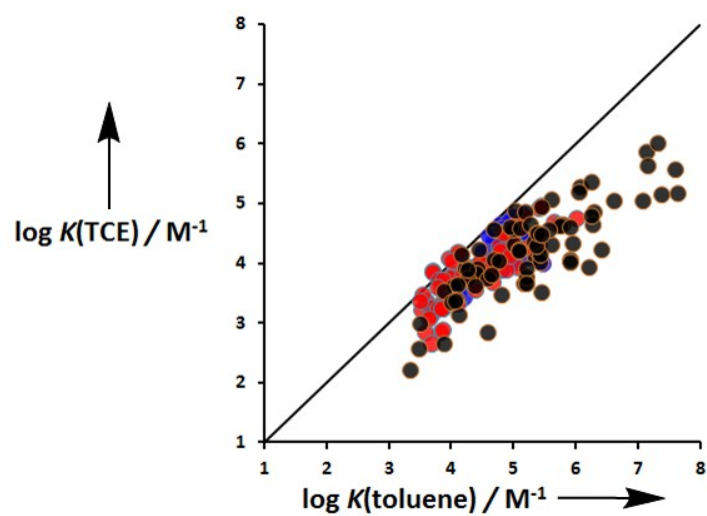

**Fig. S3.** Comparison of association constants ( $\log K / \text{M}^{-1}$ ) measured in toluene with the corresponding values measured in TCE. Data for ester amide ligands (Le) in black, ester ligands (Lb) in red and control ligands (Lc) in blue. The line corresponds to  $\log K(\text{TCE}) = \log K(\text{toluene})$ .
